# Supplementary material for: Dynamics of Single-Chain Nanoparticles under Crowding: A Neutron Spin Echo Study
Source: PubMed Central journal article supplement (PMC11141241; doi:10.1021/acs.macromol.4c00182), 2024-05-07
Supplement: ma4c00182_si_001.pdf [file ma4c00182_si_001.pdf]

# Supporting Information:

## Dynamics of Single-Chain Nanoparticles under Crowding: a Neutron Spin Echo Study

Beatriz Robles-Hernández,<sup>\*,†</sup> Paula Malo de Molina,<sup>\*,‡,¶</sup> Isabel Asenjo-Sanz,<sup>‡</sup>  
Marina Gonzalez-Burgos,<sup>‡</sup> Stefano Pasini,<sup>§</sup> José A. Pomposo,<sup>‡,¶,||</sup> Arantxa Arbe,<sup>‡</sup>  
and Juan Colmenero<sup>‡,||,†</sup>

<sup>†</sup>*Donostia International Physics Center (DIPC), 20018 Donostia-San Sebastián, Spain*

<sup>‡</sup>*Centro de Física de Materiales/Materials Physics Center (CFM/MPC), 20018  
Donostia-San Sebastián, Spain*

<sup>¶</sup>*IKERBASQUE – Basque Foundation for Science, 48009 Bilbao, Spain*

<sup>§</sup>*Forschungszentrum Jülich GmbH, Jülich Centre for Neutron Science (JCNS) at Heinz  
Maier-Leibnitz Zentrum (MLZ), 85748 Garching, Germany*

<sup>||</sup>*Department of Polymers and Advanced Materials: Physics, Chemistry and Technology,  
University of the Basque Country UPV/EHU, 20018 Donostia-San Sebastián, Spain*

E-mail: beatriz.robles@ehu.eus; p.malodemolina@ehu.eus

## S.1 Analysis of NSE Data of SCNPs in Dilute Solution in Terms of the Zimm Model with Internal Friction

The internal friction originated from diverse sources, for example, internal barriers, side-chain interactions, hindered dihedral rotations, or even hydrogen bonding, are considered in the and Zimm model with internal friction (ZIF).<sup>S1</sup> This ingredient is represented by a relaxation time  $\tau_i$ , which is added to the time of each mode in eq 6. Thus, the resulting characteristic time for the  $p$ th mode becomes  $\tau_p^{\text{ZIF}} = \tau_p^{\text{Z}} + \tau_i$ . The dilute solution data were analyzed in terms of this approach, using eqs 8 and 9 with  $\tau_p = \tau_p^{\text{ZIF}}$ . When the ZIF model is applied to the dilute solution, a good description of the data is achieved with  $\tau_i = 55$  ns, in very good agreement with previous results.<sup>S2,S3</sup> Certainly, both modified Zimm models provide a good and nearly indistinguishable description of the data (see Figure S1).

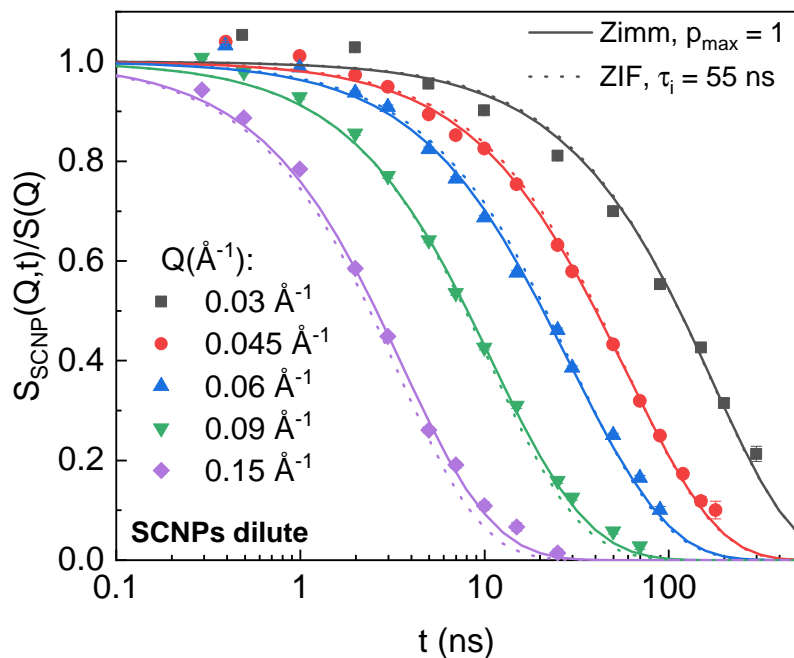

Figure S1: NSE results for SCNPs in dilute solution. Solid lines are fittings considering a Zimm model with limited mode contributions ( $p_{\text{max}} = 1$ ). The dotted lines are fittings to the ZIF model ( $\tau_i = 55$  ns).

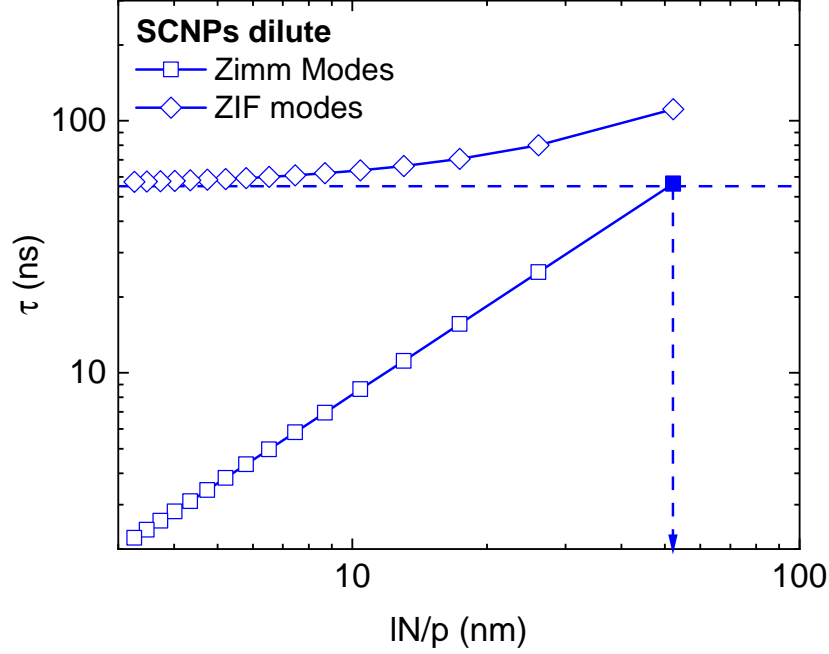

Figure S2: Dependence of the characteristic times of the Zimm modes with the wavelength for the effective chain mapping the SCNPs (blue squares) in dilute solution. Only modes with  $p \leq 1$ , highlighted as a filled symbol, would substantially contribute. The characteristic times for the ZIF model are represented by blue diamonds. Dashed arrows indicate the value of  $\tau_i$  (55 ns) and the point where the crossover from solvent- to internal friction-dominated relaxation takes place.

The corresponding spectrum of relaxation times is represented in Figure S2. The abrupt effect produced by the mode cutoff, which can be seen as a freezing of the modes with  $p > p_{\max}$  (i.e.,  $\tau_{p > p_{\max}}^Z \equiv \infty$ ) is introduced more gently in the ZIF model: it is represented by a transition from solvent friction-dominated relaxation (low- $p$  values, equivalently long-wavelength modes) to internal friction-dominated relaxation (high- $p$  values, equivalently short-wavelength modes). This crossover occurs when  $\tau_p^Z \approx \tau_i$  (see Figure S2).

## References

- (S1) Khatri, B. S.; McLeish, T. C. B. Rouse Model with Internal Friction: A Coarse Grained Framework for Single Biopolymer Dynamics. *Macromolecules* **2007**, *40*, 6770–6777.
- (S2) Arbe, A.; Pomposo, J.; Moreno, A.; LoVerso, F.; González-Burgos, M.; Asenjo-Sanz, I.; Iturrospe, A.; Radulescu, A.; Ivanova, O.; Colmenero, J. Structure and dynamics of single-chain nano-particles in solution. *Polymer* **2016**, *105*, 532–544.
- (S3) González-Burgos, M.; Asenjo-Sanz, I.; Pomposo, J. A.; Radulescu, A.; Ivanova, O.; Pasini, S.; Arbe, A.; Colmenero, J. Structure and Dynamics of Irreversible Single-Chain Nanoparticles in Dilute Solution. A Neutron Scattering Investigation. *Macromolecules* **2020**, *53*, 8068–8082.
